# Supplementary material for: Strain induced magnetic hysteresis in MoS2 and WS2 monolayers with symmetric double sulfur vacancy defects
Source: Royal Society of Chemistry journal article supplement (doi:10.1039/d2cp01213h), 2022-01-01
Supplement: d2cp01213h1.pdf [file d2cp01213h1.pdf]

## Strains Induced Magnetic Hysteresis in MoS<sub>2</sub> and WS<sub>2</sub> Monolayers with Symmetric Double Sulfur Vacancy Defects

LinXue,<sup>a,d</sup> Chaoyu He,<sup>b</sup> Zhi Yang,<sup>a</sup> Zhiyi Zhang,<sup>c</sup> Lichun Xu,<sup>a</sup> Xiaopeng Fan,<sup>a</sup> LonglongZhang,<sup>\*a</sup> and  
Lingzhen Yang<sup>\*a</sup>

<sup>a</sup>College of Physics and Optoelectronics, Taiyuan University of Technology, Taiyuan, 030024, China. E-mail:  
[yanglingzhen@tyut.edu.cn](mailto:yanglingzhen@tyut.edu.cn); [zhanglonglong@tyut.edu.cn](mailto:zhanglonglong@tyut.edu.cn)

<sup>b</sup>Laboratory for Quantum Engineering and Micro-Nano Energy Technology, School of Physics and Optoelectronics,  
Xiangtan University, Hunan 411105, China

<sup>c</sup>College of Materials Science and Engineering, Taiyuan University of Technology, Taiyuan, 030024, China

<sup>d</sup>Hongzhiwei Technology (Shanghai) Co. Ltd., 1599 Xinjinqiao Road, Pudong, Shanghai, China

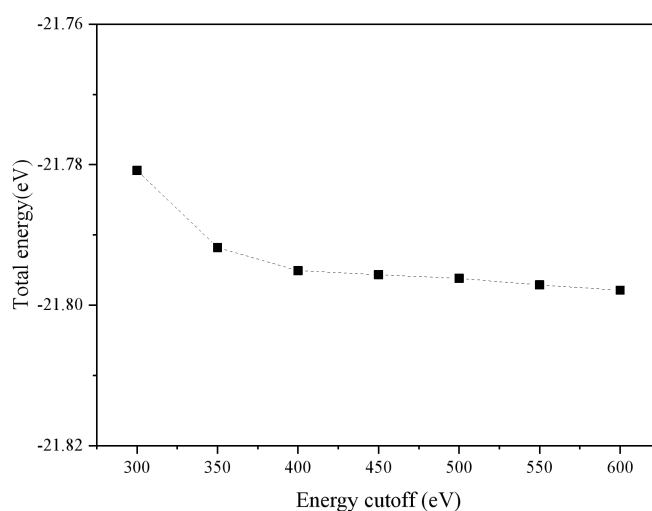

Fig. S1 The convergence for energy cutoff from 300eV to 600eV in MoS<sub>2</sub> monolayer unit-cell.

Table. S1 The total energy difference in scf calculation using same k-point density 3×3×1 after geometry optimization using different k-point density 1×1×1 and 3×3×1.

| strain |                  | tot-energy(3×3×1) | tot-energy(1×1×1) | $\Delta E$ |
|--------|------------------|-------------------|-------------------|------------|
| Load   | $\epsilon=8\%$   | -751.47259        | -751.47016        | 0.00243    |
|        | $\epsilon=10\%$  | -743.64421        | -743.64144        | 0.00277    |
|        | $\epsilon=12\%$  | -738.49087        | -738.48767        | 0.00320    |
| Unload | $\epsilon=1.6\%$ | -764.23192        | -764.23177        | 0.00015    |

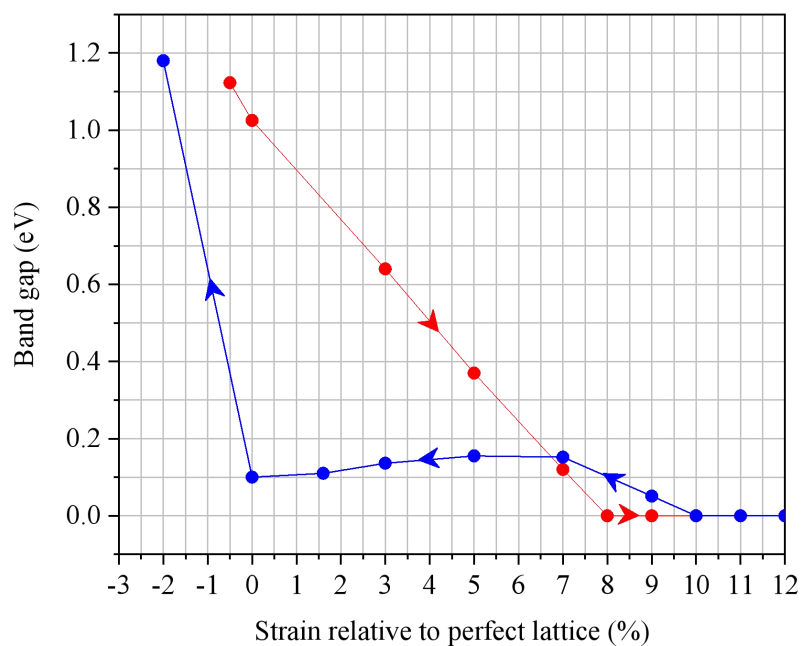

Fig. S2 The band gap of MoS<sub>2</sub> monolayer with the DSV defect for loading (red curve) and unloading (blue curve) strains.

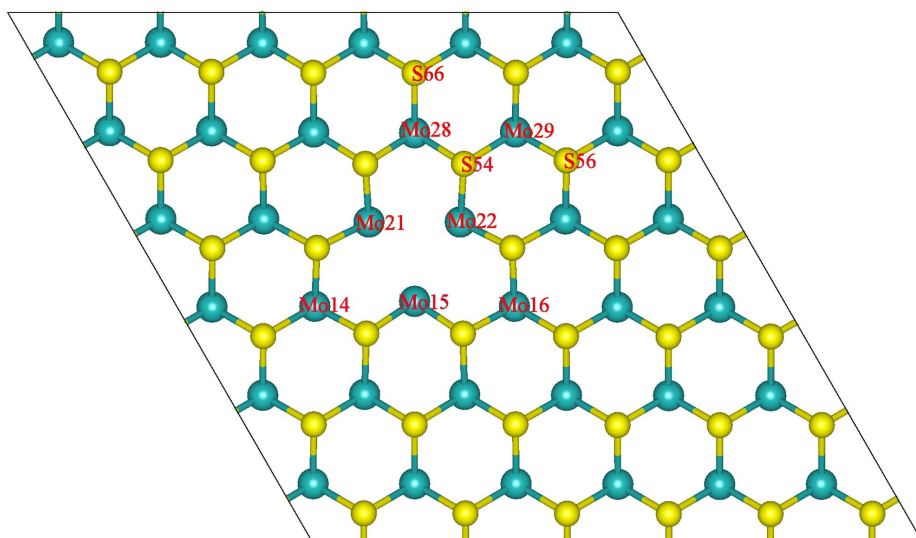

Fig. S3 Atomic indexes around the DSV defect, including the 1st-Mo atoms (Mo15, Mo21, Mo22), 2nd-Mo atoms (Mo14, Mo16, Mo28), 3rd-Mo atoms (Mo29), and the surrounding S atoms (S54, S56, S66).

Table. S2 The -ICOHP values of bonds Mo21-Mo22, S54-Mo22, S56-Mo22, Mo22-Mo29, S54-Mo28 and S66-Mo28 under different stresses.

|         |       | -ICOHP |           |          |          |           |          |          |
|---------|-------|--------|-----------|----------|----------|-----------|----------|----------|
|         |       | Spin   | Mo21-Mo22 | S54-Mo22 | S56-Mo22 | Mo22-Mo29 | S54-Mo28 | S66-Mo28 |
| perfect |       |        | 0.280     | 1.567    | 0.011    | 0.280     | 1.567    | 1.567    |
| Load    | -0.5% |        | 0.835     | 1.599    | 0.008    | 0.177     | 1.603    | 1.537    |
|         | 0%    |        | 0.823     | 1.595    | 0.008    | 0.172     | 1.529    | 1.599    |
|         | 5%    |        | 0.643     | 1.549    | 0.006    | 0.149     | 1.469    | 1.531    |
|         | 8%    | up     | 0.355     | 1.461    | 0.008    | 0.185     | 1.437    | 1.471    |
|         |       | dw     | 0.310     | 1.631    | 0.009    | 0.198     | 1.419    | 1.440    |
|         | 9%    | up     | 0.283     | 1.454    | 0.009    | 0.199     | 1.399    | 1.467    |
|         |       | dw     | 0.247     | 1.617    | 0.010    | 0.214     | 1.379    | 1.455    |
|         | 10%   | up     | 0.031     | 1.285    | 0.039    | 0.409     | 1.376    | 1.491    |
|         |       | dw     | 0.009     | 1.447    | 0.096    | 0.435     | 1.388    | 1.532    |
|         | 11%   | up     | 0.018     | 1.267    | 0.045    | 0.458     | 1.341    | 1.481    |
|         |       | dw     | 0.004     | 1.399    | 0.123    | 0.508     | 1.358    | 1.530    |
|         | 12%   | up     | -0.001    | 1.239    | 1.127    | 0.799     | 1.228    | 1.459    |
| dw      |       | 0.000  | 1.256     | 1.155    | 0.860    | 1.274     | 1.590    |          |
| Unload  | 10%   | up     | -0.001    | 1.310    | 1.058    | 0.883     | 1.325    | 1.476    |
|         |       | dw     | 0.000     | 1.308    | 1.073    | 0.914     | 1.365    | 1.581    |
|         | 7%    | up     | -0.001    | 1.397    | 0.975    | 0.959     | 1.450    | 1.486    |
|         |       | dw     | 0.001     | 1.394    | 0.986    | 1.003     | 1.488    | 1.578    |
|         | 1.6%  | up     | 0.001     | 1.537    | 0.876    | 1.068     | 1.578    | 1.512    |
|         |       | dw     | 0.004     | 1.537    | 0.880    | 1.126     | 1.631    | 1.608    |

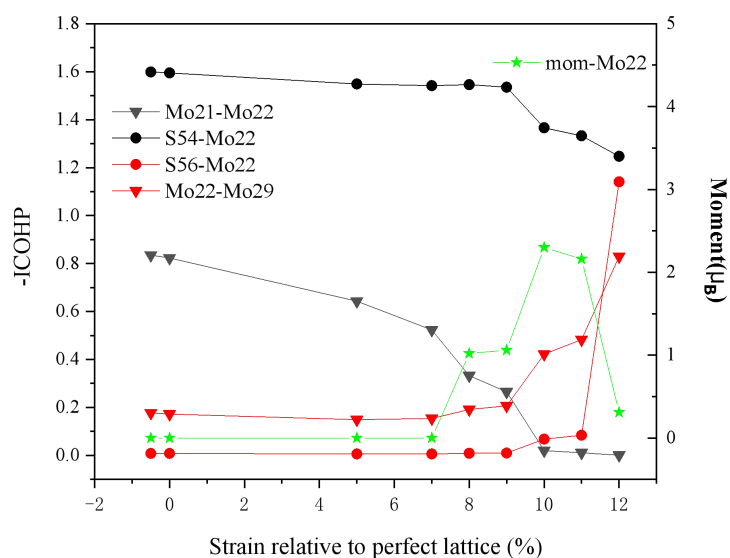

Fig. S4 The -ICOHPs (the average of up and dw) of bonds Mo21-Mo22, S54-Mo22, S56-Mo22 and Mo22-Mo29 under loading strains and the corresponding magnetic moment of Mo22 .

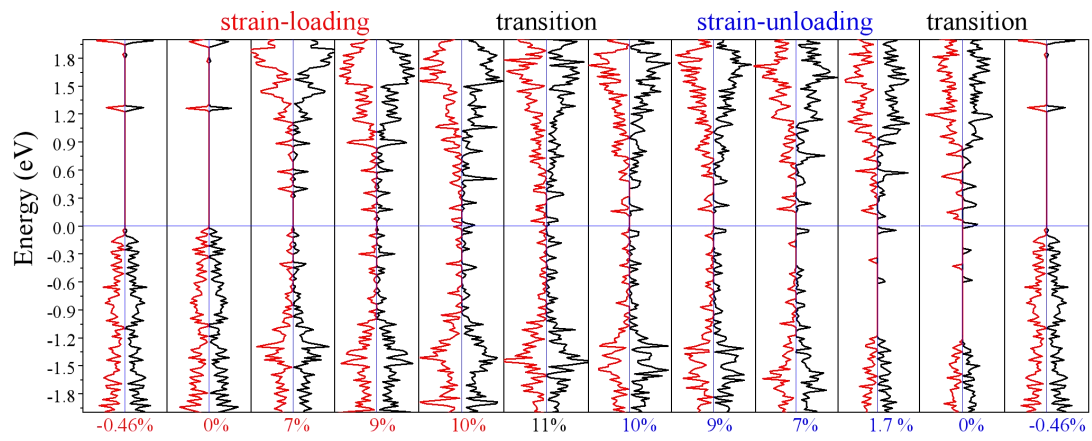

Fig. S5 The electronic density of states for the WS<sub>2</sub> monolayer with the DSV defect under different strains relative to the perfect lattice in the processes of strain loading and unloading.
